## Are there gender differences in the non-prescription of Implantable Cardioverter-Defibrillators (ICDs) in primary prevention? A single-center series.

Aguilera C.; Toquero Ramos J.; Mingo Santos S.; Garcia-Izquierdo Jaen E.; Jimenez Sanchez D.; Pham-Trung C.; Veloza Urrea D.; Morillo Diaz JD.; Garcia Rodriguez D.; Garcia Gomez S.; Remior Perez P.; Castro Urda V.; Fernandez Lozano I.

University Hospital Puerta de Hierro Majadahonda, Madrid, Spain

**Funding Acknowledgements:** Type of funding sources: None.

**Introduction:** Primary prevention of sudden cardiac death is the main indication for ICD implantation, mainly based on left ventricular ejection fraction (LVEF). Gender differences in the diagnosis and treatment of some cardiology conditions such as myocardial infarction have been previously established.

**Purpose:** We aim to analyze differences in prognostic variables that could justify gender differences in the non-prescription of an ICD for primary prevention.

**Methods:** A retrospective selection of patients from our center during 2019 with ventricular systolic dysfunction (LVED  $\leq 35\%$  in an echocardiogram) was made. We included patients at least one month after an acute myocardial infarction and with optimal medical treatment without an ICD. Death was considered during the year 2019.

**Results:** We initially selected 325 patients with ventricular dysfunction, of which 175 fulfilled the inclusion criteria (67.4% men and 32.6% women). ICD indication was considered in 47 patients out of the 175 selected (29.7% among men and 21.1% among women,  $p = 0.7$ ; 70.3% among men and 78.9% among women,  $p = 0.30$  for non-prescription). The index left ventricle end-diastolic volume (iLVEDV) was significantly worse in males. Females were older and had lower LVEF.

**Conclusion:** Although it is a unicenter study and we have only performed univariate comparisons, without considering confounding factors, we found no significant gender differences in prognostic variables that could justify differences in the non-prescription of an ICD for primary prevention.

### Results

| Variable                         | Men              | Women            | p-value |
|----------------------------------|------------------|------------------|---------|
| Age (years)                      | 74.53 $\pm$ 0.11 | 79.52 $\pm$ 0.15 | <0.01   |
| Previous cancer disease          | 11 (13.25%)      | 4 (8.89%)        | 0.77    |
| Cognitive impairment             | 12 (14.46%)      | 11 (24.44%)      | 0.08    |
| NYHA class                       | I (12.05%)       | I (6.67%)        | 0.23    |
| Mean NYHA class value            | II (69.88%)      | II (66.67%)      |         |
|                                  | III (18.07%)     | III (26.67%)     |         |
|                                  | 2.06 $\pm$ 0.11  | 2.20 $\pm$ 0.15  |         |
| Ischemic etiology                | 39 (46.99%)      | 17 (37.78%)      | 0.84    |
| Renal insufficiency              | 31 (37.35%)      | 21 (46.67%)      | 0.15    |
| Syncope or palpitations          | 16 (19.28%)      | 8 (17.78%)       | 0.58    |
| LVEDD index (cm/m <sup>2</sup> ) | 2.57 $\pm$ 0.11  | 2.71 $\pm$ 0.15  | 0.23    |
| LVEDV index (ml/m <sup>2</sup> ) | 73.18 $\pm$ 0.11 | 66.84 $\pm$ 0.15 | 1       |
| LVEF (%)                         | 28.89 $\pm$ 0.11 | 27.17 $\pm$ 0.15 | 1       |
| Death                            | 17 (20.48%)      | 8 (17.78%)       | 0.64    |

Renal insufficiency: estimated glomerular filtration rate less than 30 ml/min/1.73m<sup>2</sup> or dialysis. LVEDD: left ventricle end-diastolic diameter. NYHA: New York Heart Association.
